# Supplementary material for: Quantum mechanics and molecular mechanics study of the reaction mechanism of quorum quenching enzyme: N-acyl homoserine lactonase with C6-HSL
Source: Royal Society of Chemistry journal article supplement (doi:10.1039/c6ra00328a), 2016-01-01
Supplement: c6ra00328a1.pdf [file c6ra00328a1.pdf]

## Supplementary materials

### Quantum Mechanics and Molecular Mechanics Study on the Reaction Mechanism of Quorum Quenching Enzyme: N-Acyl Homoserine Lactonase with C6-HSL

Shujun Zhang, Hao su, Guangcai Ma, Yongjun Liu

Key Laboratory of Colloid and Interface Chemistry, Ministry of Education, School of Chemistry and Chemical Engineering, Shandong University, Jinan, Shandong 250100, China

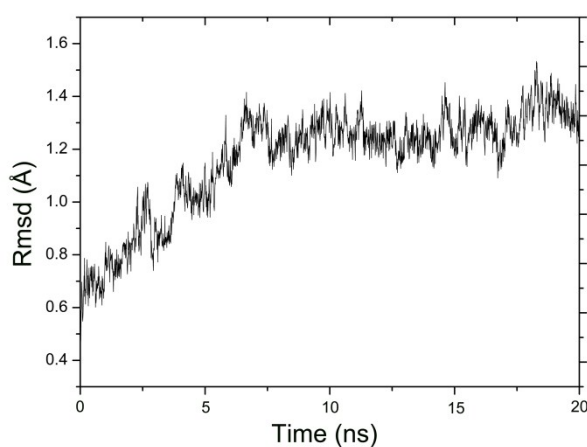

Fig. S1 The RMSD of AidH in complex with C6-HSL obtained from 20 ns MD simulation.

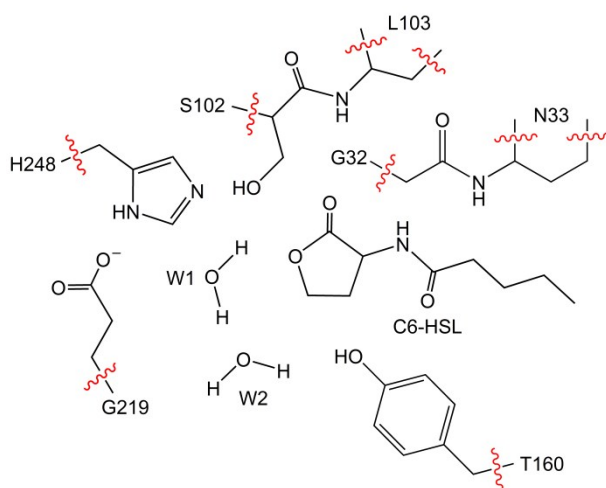

Fig. S2 QM region selected for the QM/MM calculations.

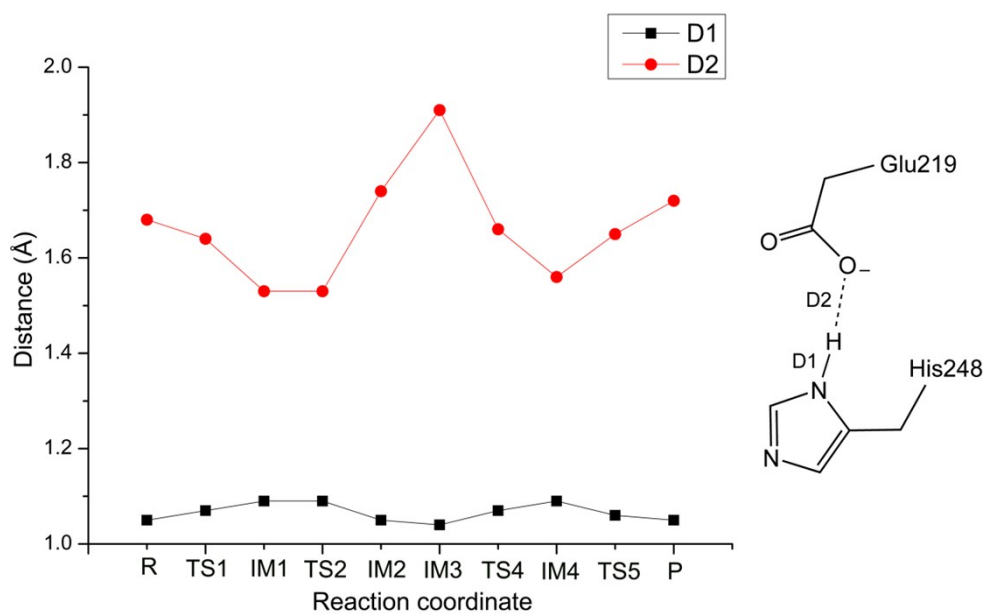

Fig. S3 Changes of two key distances along the degradation of C6-HSL.

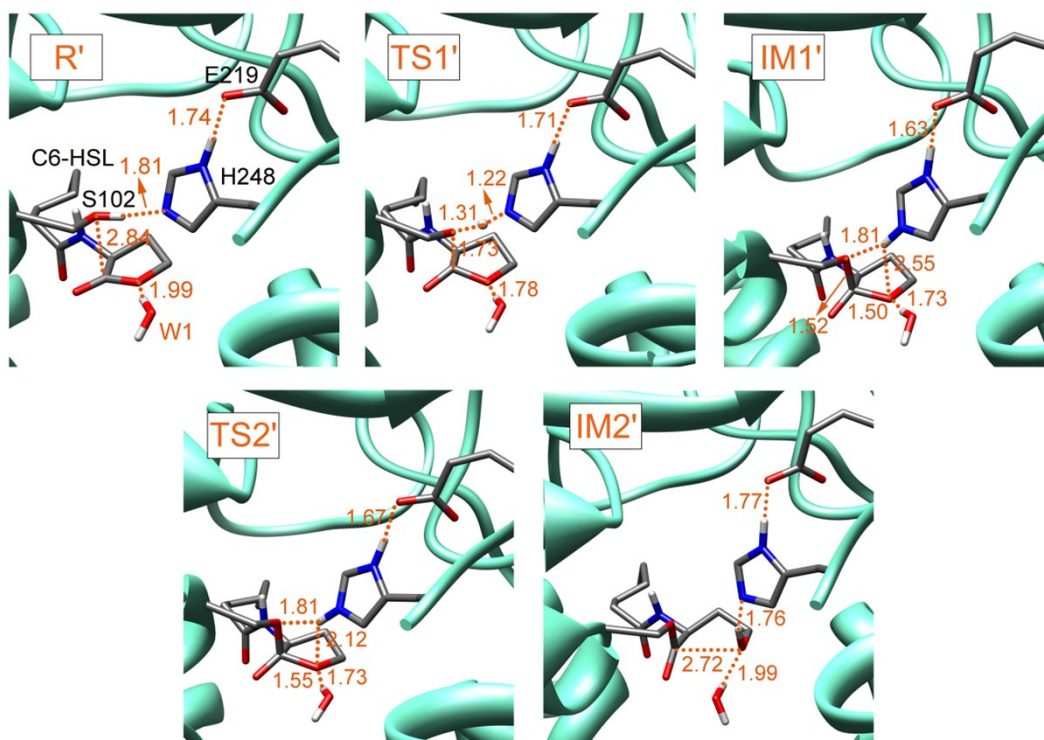

Fig. S4 Optimized structures for the first two steps of the reaction catalyzed by Y160A mutant. Distances are given in angstroms.

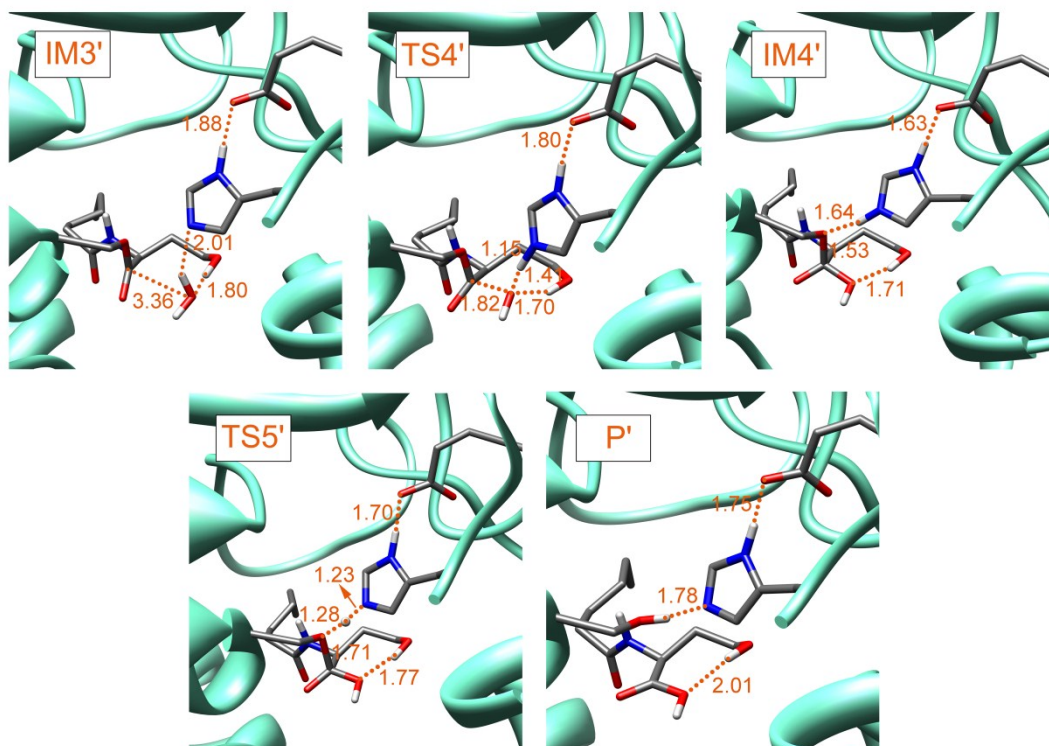

Fig. S5 Optimized structures for last two steps of the reaction catalyzed by Y160A mutant. Distances are given in angstroms.
